# Supplementary material
Source: PubMed Central journal article supplement (PMC5828976)
Supplement: NIHMS927161-supplement-Supp_FigS1.pdf [file NIHMS927161-supplement-Supp_FigS1.pdf]

Using CD45<sup>+</sup>lin<sup>-</sup>GATA-3<sup>bright</sup> for gating ILC2:

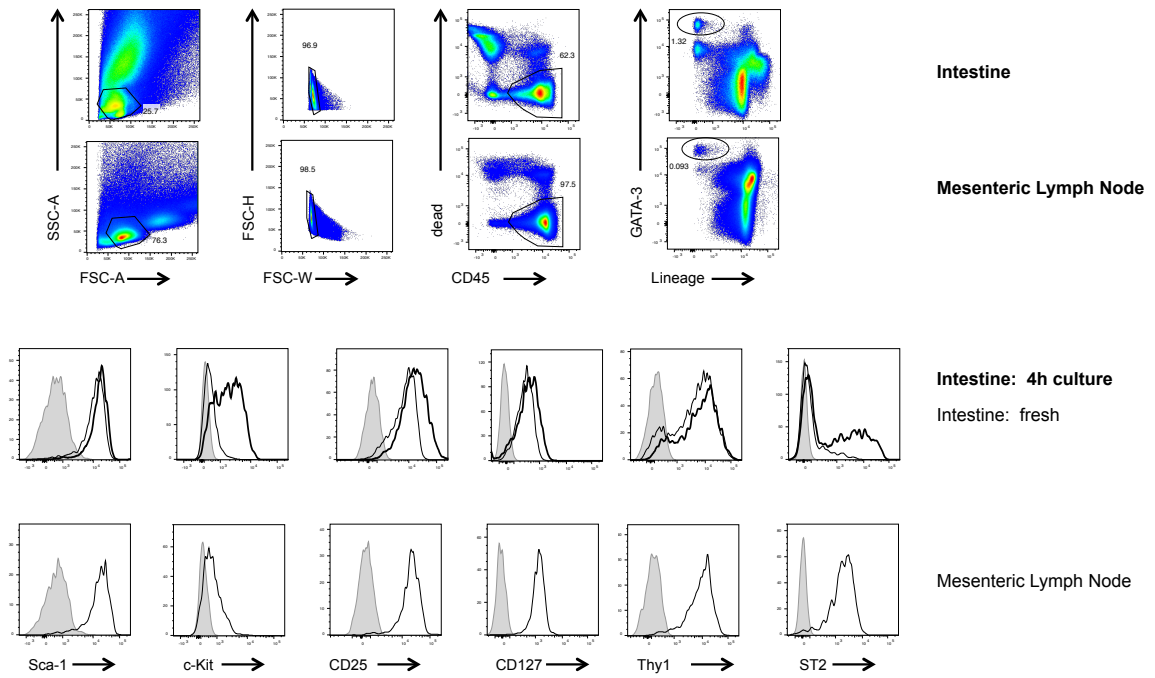

**Supplementary Figure 1.** Flow cytometric gating strategies and surface marker analysis for ILC2 in the BALB/c small intestinal lamina propria and mesenteric lymph nodes.
